# Supplementary material for: A high-throughput method for testing biofouling and cleaning of polymer hydrogel materials used in medical devices
Source: Royal Society of Chemistry journal article supplement (doi:10.1039/c3ay40501j), 2014-01-01
Supplement: c3ay40501j1.pdf [file c3ay40501j1.pdf]

**Figure SI1.** Comparison of the sample testing format, preparation for analysis, and sample analysis method for the microplate method and two validation procedures.

| Procedure                                                                                        | Purpose                                                    | Sample testing                                                                                                    | Preparation for Analysis                                                | Sample Analysis                |
|--------------------------------------------------------------------------------------------------|------------------------------------------------------------|-------------------------------------------------------------------------------------------------------------------|-------------------------------------------------------------------------|--------------------------------|
| Validation #1-full-sized samples with microscope                                                 | Validate miniaturized high-throughput method               | Full-sized samples soaked and/or cleaned in full-sized vessels                                                    | Punch and mount on slide or any compatible flat optical quality surface | Confocal microscopy            |
| Validation #2-samples tested in microplate but results read with microarray fluorescence scanner | Validate use of microplate reader for endpoint measurement | Similar to microplate method but with 96-well plate due to resolution and sensitivity limitation of array scanner | Samples tested directly in microplate                                   | Fluorescence array scanner     |
| Microplate Method                                                                                |                                                            | 3mm biopsy punches in standard 384-well microplates                                                               | Samples tested directly in microplate                                   | Microplate fluorescence reader |

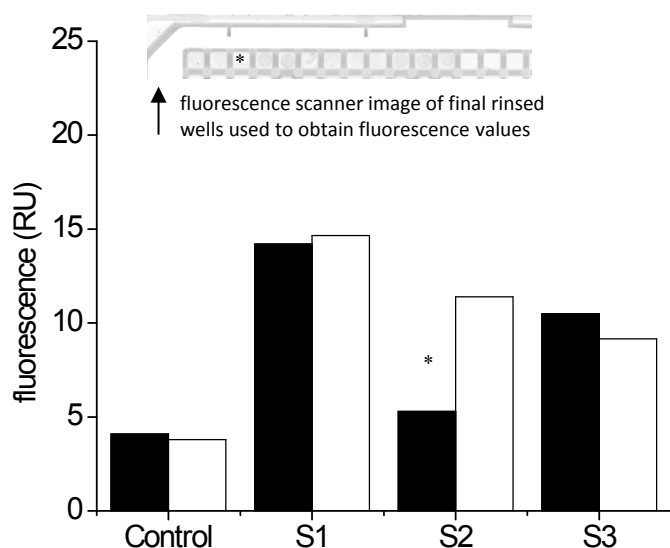

**Figure SI2.** Comparison of data obtained with a flatbed fluorescence scanner (through the bottom of the wells) and in the microplate fluorescence reader. White bars: data from fluorescence scanner, Black bars: data from microplate reader scaled by 10x.
